# Supplementary material for: Construction of portable electrochemical immunosensors based on graphene hydrogel@polydopamine for microcystin-LR detection using multi-mesoporous carbon sphere-enzyme labels
Source: Royal Society of Chemistry journal article supplement (doi:10.1039/c6ra07881h), 2016-01-01
Supplement: c6ra07881h1.pdf [file c6ra07881h1.pdf]

**Construction of portable electrochemical immunosensor based on the  
graphene hydrogel@polydopamine for microcystin-LR detection by  
using multi-mesoporous carbon spheres-enzyme label**

*Cuifen Gan<sup>a</sup>, Zihong Sun<sup>a</sup>, Li Ling<sup>b</sup>, Zuyu He<sup>a</sup>, Hongtao Lei<sup>b</sup>, Yingju Liu<sup>a,\*</sup>*

<sup>a</sup> Department of Applied Chemistry, College of Materials & Energy, South China  
Agricultural University, Guangzhou 510642, China

<sup>b</sup> The Guangdong Provincial Key Laboratory of Food Quality and Safety, College of  
Food Science, South China Agricultural University, Guangzhou 510642, China

---

\* To whom correspondence should be addressed. E-mail: liuyingju@hotmail.com. Tel: 86-20-85280319; Fax: 86-20-85282366

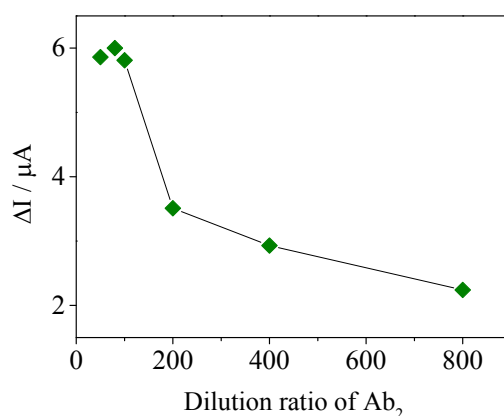

**Fig. S1** Effect of the dilution ratio of Ab<sub>2</sub>.

### Estimation of detection limit

According to the international union of pure and applied chemistry (IUPAC) (Fassel. 1978), the limit of detection (LOD), expressed as the concentration,  $c_L$ , is derived from the value calculated by the calibration plot obtained from a given analytical procedure where  $x_L = x_{b1} + 3s_{b1}$ , where  $x_L$  is the smallest measure,  $x_{b1}$  is the mean signal of the blank measures and  $s_{b1}$  is the standard deviation of the blank measures. In this work, after making twelve measurements of blank, the  $x_{b1} = 23.33$  and  $s_{b1} = 0.12$  was obtained. Therefore,  $x_L = x_{b1} + 3s_{b1} = 23.33 + 3 \times 0.12 = 23.69$ . The calibration plot of this proposed immunosensor is  $\Delta I = 8.21 - 7.69 \times \lg C_{MC-LR}$ . Therefore, the  $c_L = 10^{(\Delta I - 8.21)/(-7.69)} = 10^{(23.69 - 8.21)/(-7.69)} = 0.0097 \mu\text{g/L} = 9.7 \text{ ng/L}$  (Ren et al. 2015), where  $\Delta I$  is the  $x_L$  at 23.69. In conclusion, the LOD of this proposed immunosensor for the detection of MC-LR is 9.7 ng/L.

### References

- V. A. Fassel, Nomenclature, symbols, units and their usage in spectrochemical analysis-II. data interpretation analytical chemistry division, Spectrochim. Acta Part B: At. Spectrosc. 33 (1978) 241.
- K. Ren, J. Wu, F. Yan, Y. Zhang, H. Ju, Immunoreaction-triggered DNA assembly for one-step sensitive ratiometric electrochemical biosensing of protein biomarker, Biosens. Bioelectron. 66 (2015) 345.

**Table S1** Comparison with other reported analysis method of MC-LR

| Method | Linear range | Detection limit | Ref. |
|--------|--------------|-----------------|------|
|--------|--------------|-----------------|------|

|                              | ( $\mu\text{g/L}$ )                                                            | ( $\mu\text{g/L}$ )                                     |           |
|------------------------------|--------------------------------------------------------------------------------|---------------------------------------------------------|-----------|
| Phosphatase inhibition assay | 0.4-10                                                                         | 0.2                                                     | [1]       |
| LC-MS                        | 0.01-2.5 $\mu\text{g/g}$                                                       | 0.005 $\mu\text{g/g}$                                   | [2]       |
| ELISA                        | 0.3-10                                                                         | 0.1                                                     | [3]       |
| Aptamer sensor               | 0.05-100<br><sup>a</sup> ( $1.0 \times 10^{-7}$ - $5.0 \times 10^{-11}$ mol/L) | 0.018<br><sup>a</sup> ( $1.8 \times 10^{-11}$<br>mol/L) | [4]       |
| Label-free immunosensor      | 0.05-15                                                                        | 0.02<br><sup>a</sup> (20 ng/L)                          | [5]       |
| Graphene immunosensor        | 0.05-15                                                                        | 0.016                                                   | [6]       |
| Fluorescence immunosensor    | 0.02-16<br><sup>a</sup> (0.02-16 ng/mL)                                        | 0.007<br><sup>a</sup> (0.007 ng/mL)                     | [7]       |
| Electrochemical immunosensor | 0.05-20                                                                        | 0.03                                                    | [8]       |
| Immunosensor                 | 0.01-10                                                                        | 0.0097                                                  | This work |

<sup>a</sup> the data is from the original work.

#### References:

- [1] C. Rivasseau, P. Racaud, A. Deguin, M.C. Hennion, Development of a bioanalytical phosphatase inhibition test for the monitoring of microcystins in environmental water samples, *Anal. Chim. Acta* 394 (1999) 243.
- [2] X. Guo, P. Xie, J. Chen, X. Tuo, X. Deng, S. Li, D. Yu, C. Zheng, Simultaneous quantitative determination of microcystin-LR and its glutathione metabolites in rat liver by liquid chromatography-tandem mass spectrometry, *J. Chromatogr. B* 963 (2014) 54.
- [3] J. Sheng, M. He, H. Shi, A highly specific immunoassay for microcystin-LR detection based on a monoclonal antibody, *Anal. Chim. Acta* 603 (2007) 111.
- [4] Z. Lin, H. Huang, Y. Xu, X. Gao, B. Qiu, X. Chen, G. Chen, Determination of microcystin-LR in water by a label-free aptamer based electrochemical impedance biosensor, *Talanta* 103 (2013) 371
- [5] P. Tong, S. Tang, Y. He, Y. Shao, L. Zhang, G. Chen. Label-free immunosensing of microcystin-LR using a gold electrode modified with gold nanoparticle, *Microchim. Acta*, 173 (2011) 299.
- [6] H. Zhao, J. Tian, X. Quan. A graphene and multienzyme functionalized carbon nanosphere-based electrochemical immunosensor for microcystin-LR detection, *Colloids Surf. B: Biointerf.* 103 (2013) 38.
- [7] Y. Li, J. Sun, L. Wu, J. Ji, X. Sun, Y. Qian. Surface-enhanced fluorescence immunosensor using Au nano-crosses for the detection of microcystin-LR. *Biosens. Bioelectron.* 62 (2014) 255.

[8] J. Zhang, J. Lei, C. Xu, L. Ding, H. Ju. Carbon nanohorn sensitized electrochemical immunosensor for rapid detection of microcystin-LR. *Anal. Chem.* 82 (2010) 1117.
